# Supplementary material for: Intrinsic anti-inflammatory properties in the serum of two species of deep-diving seal
Source: Oxford University Press journal article supplement (doi:10.1242/jeb.178491), 2018-01-01
Supplement: jeb178491supp.pdf [file jeb178491supp.pdf]

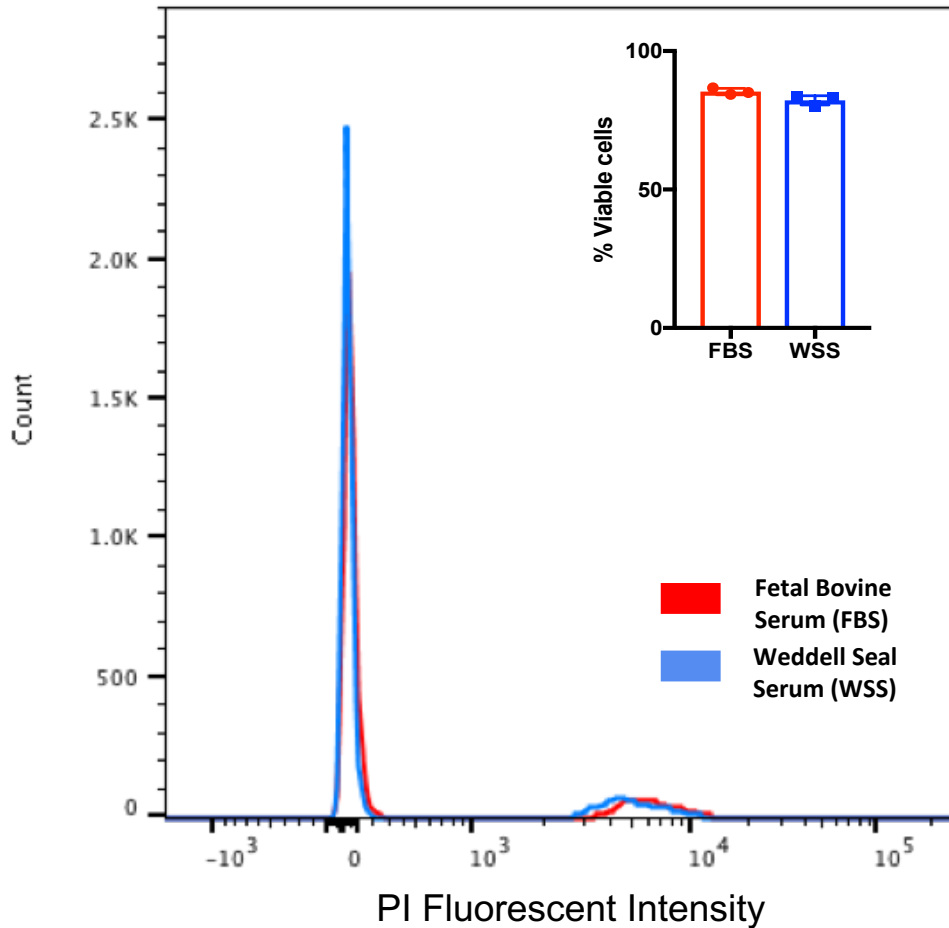

**Fig. S1.** Flow cytometry outputs for cell viability in mouse monocytes. RAW 264.7 cells were incubated with medium containing 10%Fetal Bovine Serum (FBS) or 10% Weddell Seal Serum (WSS) for 6 h. Cell viability was determined by staining the cells with Propidium Iodide (PI) and performing flow cytometry. A representative histogram comparing cells incubated in FBS and WSS is shown, together with cell viability for three replicates (inset).

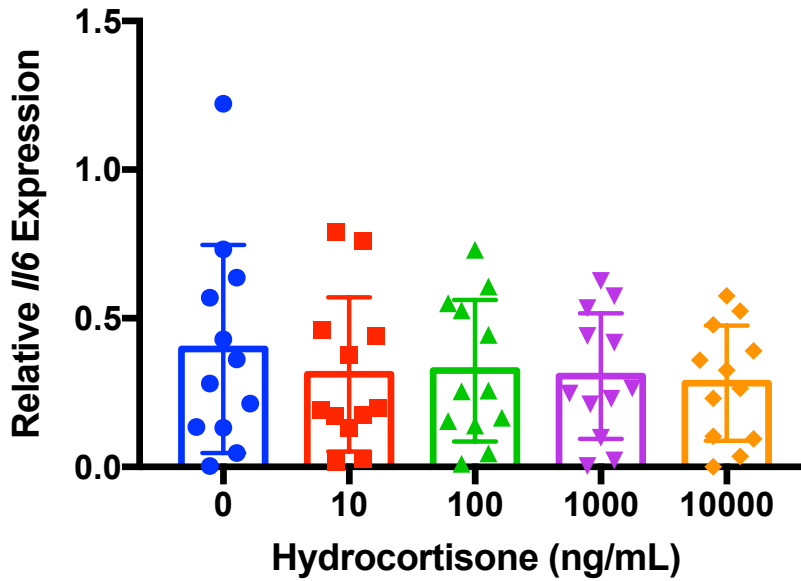

**Fig. S2.** //6 expression of isolated Weddell seal monocytes (n=11 seals) exposed to 100ng/mL LPS does not change with hydrocortisone supplementation ( $F=1.085$ ,  $p=0.37$ ).
